# Supplementary material for: Effect of Early Initiation of Evolocumab on Lipoprotein(a) in Patients with Acute Myocardial Infarction: Sub-Analysis of a Randomized Controlled Trial
Source: MDPI journal article supplement (doi:10.3390/jcdd9050153), 2022-05-12
Supplement: s1 [file s1]

**Table S1.** Changes in Lipid Levels

| Lipid levels                         | Evolocumab    | Control      | Mean difference (95% CI) | p value |
|--------------------------------------|---------------|--------------|--------------------------|---------|
| Total cholesterol at baseline, mg/dL | 187.9 ± 40.6  | 188.3 ± 38.5 | -1.1 (-19.5 to 17.1)     | 0.90    |
| Total cholesterol at week 4, mg/dL   | 91.2 ± 19.8   | 145.1 ± 28.8 | -50.1 (-61.6 to -38.6)   | <0.001  |
| Absolute change from baseline, mg/dL | -96.7 ± 39.8  | -43.2 ± 39.2 | -51.3 (-69.2 to -33.4)   | <0.001  |
| % change from baseline, %            | -50.0 ± 12.4  | -20.9 ± 18.2 | -28.6 (-35.7 to -21.6)   | <0.001  |
| LDL at baseline, mg/dL               | 120.8 ± 30.6  | 124.7 ± 33.6 | -0.2 (-14.8 to 14.3)     | 0.972   |
| LDL at week 4, mg/dL                 | 27.3 ± 13.4   | 79.8 ± 23.2  | -48.6 (-57.5 to -39.8)   | <0.001  |
| Absolute change from baseline, mg/dL | -93.4 ± 32.6  | -44.8 ± 32.1 | -48.9 (-63.7 to -34.1)   | <0.001  |
| % change from baseline               | -76.1 ± 12.7  | -33.1 ± 22.0 | -43.9 (-52.1 to -35.6)   | <0.001  |
| Triglyceride at baseline, mg/dL      | 104.8 ± 101.0 | 110.2 ± 83.9 | -15.7 (-59.3 to 27.9)    | 0.48    |
| Triglyceride at week 4, mg/dL        | 116.6 ± 52.7  | 131.1 ± 61.2 | -8.4 (-35.3 to 18.3)     | 0.53    |
| Absolute change from baseline, mg/dL | 11.8 ± 92.5   | 21.1 ± 94.7  | 7.2 (-36.5 to 50.9)      | 0.74    |
| % change from baseline, %            | 75.0 ± 123.8  | 76.7 ± 115.7 | 21.0 (-34.8 to 76.8)     | 0.46    |
| HDL-C at baseline, mg/dL             | 44.7 ± 12.2   | 43.2 ± 9.2   | 0.6 (-4.3 to 5.7)        | 0.79    |
| HDL-C at week 4, mg/dL               | 44.8 ± 11.5   | 42.2 ± 9.7   | 1.8 (-2.9 to 6.7)        | 0.44    |
| Absolute change from baseline, mg/dL | 0.04 ± 9.4    | -1.02 ± 8.3  | 1.2 (-2.9 to 5.4)        | 0.57    |

|                                      |              |              |                        |        |
|--------------------------------------|--------------|--------------|------------------------|--------|
| % change from baseline, %            | 2.8 ± 21.4   | -0.7 ± 20.3  | 3.4 (-6.3 to 13.3)     | 0.48   |
| Non-HDL at baseline, mg/dL           | 143.1 ± 37.8 | 145.1 ± 36.7 | -0.5 (-16.4 to 17.4)   | 0.95   |
| Non-HDL at week 4, mg/dL             | 46.3 ± 14.7  | 102.9 ± 25.4 | -52.0 (-61.7 to -42.4) | <0.001 |
| Absolute change from baseline, mg/dL | -96.7 ± 38.2 | -42.2 ± 37.0 | -52.5 (-69.6 to -35.4) | <0.001 |
| % change from baseline, %            | -66.2 ± 12.5 | -26.0 ± 22.1 | -39.3 (-48.0 to -31.5) | <0.001 |
| Apoprotein B at baseline, mg/dL      | 95.1 ± 22.9  | 97.2 ± 21.9  | -0.8 (-11.1 to 9.5)    | 0.88   |
| Apoprotein B at week 4, mg/dL        | 34.1 ± 12.0  | 75.2 ± 15.8  | -38.4 (-45.0 to -31.9) | <0.001 |
| Absolute change from baseline, mg/dL | -60.9 ± 23.2 | -21.9 ± 22.0 | -37.6 (-47.9 to -27.3) | <0.001 |
| % change from baseline, %            | -62.8 ± 13.7 | -19.8 ± 20.6 | -42.7 (-50.7 to -34.7) | <0.001 |
| Apoprotein C3 at baseline, mg/dL     | 8.8 ± 5.5    | 8.6 ± 3.6    | -0.4 (-2.6 to 1.7)     | 0.7    |
| Apoprotein C3 at week 4, mg/dL       | 7.2 ± 2.1    | 8.4 ± 2.8    | -1.0 (-2.2 to 0.1)     | 0.07   |
| Absolute change from baseline, mg/dL | -1.6 ± 4.9   | -0.2 ± 3.7   | -0.6 (-2.7 to 1.3)     | 0.52   |
| % change from baseline, %            | -8.7 ± 25.7  | 4.4 ± 35.6   | -8.8 (-23.3 to 5.6)    | 0.23   |
| Apoprotein A1 at baseline, mg/dL     | 122.0 ± 25.0 | 121.4 ± 18.9 | 2.0 (-8.2 to 12.2)     | 0.70   |
| Apoprotein A1 at week 4, mg/dL       | 129.8 ± 22.7 | 121.0 ± 23.4 | 8.3 (-2.1 to 18.8)     | 0.12   |
| Absolute change from baseline, mg/dL | 7.7 ± 22.0   | -0.3 ± 17.6  | 10.3 (1.0 to 19.7)     | 0.03   |
| % change from baseline, %            | 8.4 ± 18.9   | 0.2 ± 15.1   | 10.0 (1.9 to 18.0)     | 0.02   |

|                                      |              |               |                        |        |
|--------------------------------------|--------------|---------------|------------------------|--------|
| Small dense LDL at baseline, mg/dL   | 34.7 ± 20.1  | 36.7 ± 19.3   | -2.3 (-11.5 to 6.8)    | 0.61   |
| Small dense LDL at week 4, mg/dL     | 9.4 ± 4.3    | 23.0 ± 10.4   | -12.6 (-16.3 to -8.8)  | <0.001 |
| Absolute change from baseline, mg/dL | -25.3 ± 18.7 | -13.7 ± 19.6  | -10.2 (-19.1 to -1.2)  | 0.03   |
| % change from baseline, %            | -67.3 ± 17.2 | -13.8 ± 109.7 | -48.3 (-85.4 to -11.3) | 0.01   |

---

Values have been given as mean ± standard deviation; the mean difference was calculated with a linear mixed-effects model adjusting for statin treatment at baseline.

CI, confidence interval; HDL, high-density lipoprotein cholesterol; LDL, low-density lipoprotein cholesterol.
